# Supplementary material for: A molecularly imprinted polymer based on a novel polyaniline–zinc sulfide nanocomposite for electrochemical detection of trimethylamine N-oxide
Source: Royal Society of Chemistry journal article supplement (doi:10.1039/d2en00624c), 2022-01-01
Supplement: d2en00624c1.pdf [file d2en00624c1.pdf]

## A Molecularly Imprinted Polymer based on Novel Polyaniline–Zinc Sulfide Nanocomposite for Electrochemical Detection of Trimethylamine N-Oxide

Damini Verma<sup>1#</sup>, Reena k. Sajwan<sup>1#</sup>, G.B.V.S. Lakshmi<sup>1</sup>, Anil Kumar<sup>2\*</sup>, and Pratima R.  
Solanki<sup>1\*</sup>

<sup>1</sup>Nano-bio Laboratory, Special Center for Nanoscience, Jawaharlal Nehru University, New Delhi-110067

<sup>2</sup>Gene Regulation Laboratory, National Institute of Immunology, New Delhi 110067, India

\*Corresponding Author Email Id: [partima@mail.jnu.ac.in](mailto:partima@mail.jnu.ac.in), [pratimarsolanki@gmail.com](mailto:pratimarsolanki@gmail.com),  
[anilk@nii.ac.in](mailto:anilk@nii.ac.in)

Tel: 011-26704740/26704699

# These authors have contributed equally

Supplementary information (SI):

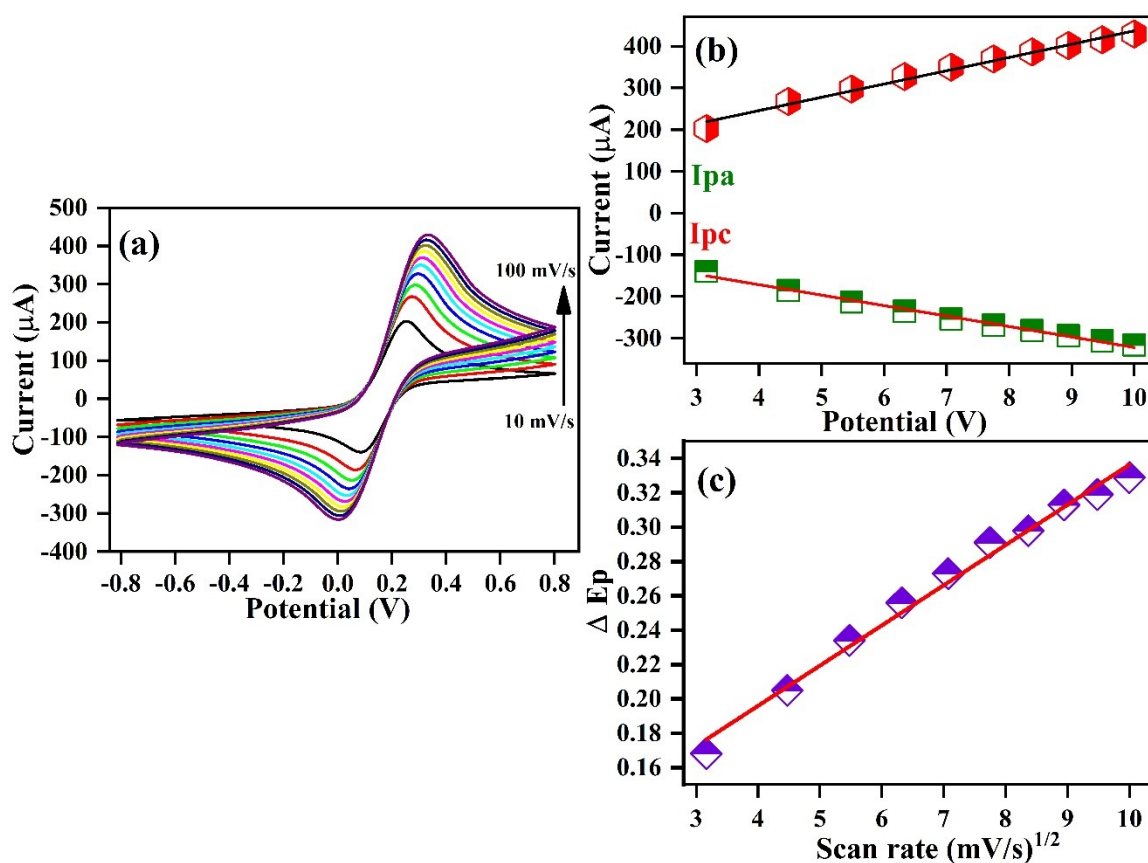

**Fig.S1** (a) Scan rate analysis of NIP/ITO electrode in PBS (b) I<sub>pa</sub> as well as I<sub>pc</sub> peak currents curves and (c) Shift in peak potential (ΔE<sub>p</sub>) with square root of scan rates, respectively.
